# Supplementary material
Source: PubMed Central journal article supplement (PMC11040548)
Supplement: NIHMS1984710-supplement-1.pdf [file NIHMS1984710-supplement-1.pdf]

## Appendix A. Tables

Table S1 Statistics of Corpus BiolarkGSC+ and COPD-HPO

| Within each sample | Metric             | BiolarkGSC+ | COPD-HPO |
|--------------------|--------------------|-------------|----------|
| Sentences          | Min                | 1           | 1        |
|                    | Max                | 23          | 30       |
|                    | Average            | 7.2         | 5.3      |
|                    | Standard deviation | 3.7         | 3.6      |
| Tokens             | Min                | 19          | 1        |
|                    | Max                | 359         | 687      |
|                    | Average            | 148.9       | 122.7    |
|                    | Standard deviation | 70.9        | 77.8     |
| Labels             | Min                | 1           | 0        |
|                    | Max                | 54          | 16       |
|                    | Average            | 12.2        | 2.3      |
|                    | Standard deviation | 8.8         | 2.0      |

Table S2 Parameter settings of the re-ranking model, including the pre-trained language model BlueBERT and the other components

| BlueBERT-related parameters |                   | Other parameters    |        |
|-----------------------------|-------------------|---------------------|--------|
| Hidden size                 | 768               | Epochs              | 50     |
| Number of hidden layers     | 12                | Early stop delta    | 0.001  |
| Number of attention heads   | 12                | Early stop patience | 10     |
| Dropout probability         | 0.1               | Learning rate       | 0.0002 |
| Max length of text          | 512               | Batch size          | 20     |
| Vocabulary size             | 30,522            |                     |        |
| Hidden activation           | GELU              |                     |        |
| Pooler                      | Output of '[CLS]' |                     |        |

Table S3 Performance comparison on BiolarkGSC+ and COPD-HPO testing sets

| Method/Metric          | BiolarkGSC+  |              |              | COPD-HPO     |              |              |
|------------------------|--------------|--------------|--------------|--------------|--------------|--------------|
|                        | Precision    | Recall       | F1-score     | Precision    | Recall       | F1-score     |
| OBO Anotator [9]       | 0.780        | 0.428        | 0.553        | 0.212        | 0.154        | 0.178        |
| NCBO [10]              | 0.553        | 0.396        | 0.462        | 0.502        | 0.647        | 0.603        |
| MonarchInitiative [16] | 0.536        | <b>0.464</b> | 0.498        | 0.472        | 0.642        | 0.589        |
| Doc2hpo-Ensemble [15]  | 0.504        | 0.306        | 0.381        | 0.663        | 0.567        | 0.589        |
| MetaMap [12]           | 0.531        | 0.440        | 0.481        | 0.478        | <b>0.731</b> | 0.646        |
| Clinphen [11]          | 0.491        | 0.247        | 0.328        | 0.248        | 0.173        | 0.187        |
| NeuralCR [14]          | 0.602        | 0.347        | 0.441        | 0.486        | 0.594        | 0.563        |
| TrackHealth            | 0.592        | 0.313        | 0.409        | 0.587        | 0.486        | 0.532        |
| PhenoTagger [17]       | 0.623        | 0.460        | 0.529        | 0.562        | 0.712        | 0.628        |
| MMRerank               | 0.798        | 0.404        | 0.537        | <b>0.710</b> | 0.647        | 0.677        |
| MNIRerank              | <b>0.834</b> | 0.444        | <b>0.579</b> | 0.667        | 0.594        | 0.629        |
| PTRerank               | 0.716        | 0.432        | 0.539        | 0.706        | 0.703        | <b>0.704</b> |

Table S4 Performance comparison on BiolarkGSC+ and COPD-HPO without post-processing

| Method/Metric     | BiolarkGSC+  |              |              | COPD-HPO     |              |              |
|-------------------|--------------|--------------|--------------|--------------|--------------|--------------|
|                   | P            | R            | F1           | P            | R            | F1           |
| OBO Anotator      | 0.697        | 0.393        | 0.503        | 0.224        | 0.171        | 0.194        |
| NCBO              | 0.549        | 0.474        | 0.509        | 0.493        | 0.650        | 0.560        |
| MonarchInitiative | 0.547        | 0.542        | 0.545        | 0.447        | 0.638        | 0.526        |
| Doc2hpo-Ensemble  | 0.666        | 0.424        | 0.518        | 0.639        | 0.557        | 0.595        |
| MetaMap           | 0.592        | 0.539        | 0.564        | 0.461        | <b>0.707</b> | 0.558        |
| Clinphen          | 0.495        | 0.286        | 0.363        | 0.236        | 0.171        | 0.198        |
| NeuralCR          | 0.651        | 0.440        | 0.525        | 0.470        | 0.586        | 0.522        |
| TrackHealth       | 0.661        | 0.409        | 0.505        | 0.584        | 0.485        | 0.530        |
| PhenoTagger       | 0.694        | <b>0.734</b> | 0.714        | 0.554        | 0.638        | 0.593        |
| MMRerank          | 0.844        | 0.445        | 0.583        | 0.672        | 0.693        | <b>0.682</b> |
| MNIRerank         | <b>0.852</b> | 0.515        | 0.642        | 0.667        | 0.594        | 0.629        |
| PTRerank          | 0.808        | 0.673        | <b>0.734</b> | <b>0.682</b> | 0.616        | 0.647        |

Table S5 Performance comparison on a subset aligned with our previous study

| BiolarkGSC+ Subset |
|--------------------|
|--------------------|

| Method/Metric     | P            | R            | F1           |
|-------------------|--------------|--------------|--------------|
| OBO Anotator      | 0.809        | 0.565        | 0.665        |
| NCBO              | 0.468        | 0.485        | 0.476        |
| MonarchInitiative | 0.757        | 0.605        | 0.673        |
| Doc2hpo-Ensemble  | 0.768        | 0.618        | 0.685        |
| MetaMap           | 0.516        | 0.568        | 0.541        |
| Clinphen          | 0.597        | 0.416        | 0.490        |
| NeuralCR          | 0.741        | 0.602        | 0.664        |
| TrackHealth       | 0.753        | 0.583        | 0.658        |
| PhenoTagger       | 0.774        | <b>0.740</b> | 0.757        |
| MMRerank          | 0.648        | 0.525        | 0.580        |
| MNIRerank         | 0.785        | 0.557        | 0.652        |
| PTRerank          | <b>0.813</b> | 0.710        | <b>0.758</b> |

Table S6 Calibrated precision on BiolarkGSC+ and COPD-HPO

| Method/Metric     | BiolarkGSC+  |            |              | COPD-HPO     |            |              |
|-------------------|--------------|------------|--------------|--------------|------------|--------------|
|                   | Precision    | Error Rate | Calibration  | Precision    | Error Rate | Calibration  |
| OBO Anotator      | 0.810        | 8.84%      | 0.824        | 0.318        | 4.21%      | 0.338        |
| NCBO              | 0.777        | 5.97%      | 0.785        | 0.756        | 5.36%      | 0.764        |
| MonarchInitiative | 0.751        | 6.03%      | 0.763        | 0.741        | 4.97%      | 0.750        |
| Doc2hpo-Ensemble  | 0.754        | 7.32%      | 0.767        | 0.779        | 6.68%      | 0.749        |
| MetaMap           | 0.707        | 6.12%      | 0.723        | 0.640        | 7.28%      | 0.666        |
| Clinphen          | 0.590        | 7.95%      | 0.603        | 0.377        | 6.52%      | 0.394        |
| NeuralCR          | 0.736        | 8.37%      | 0.758        | 0.543        | 8.37%      | 0.580        |
| TrackHealth       | 0.757        | 7.12%      | 0.772        | 0.719        | 7.12%      | 0.734        |
| PhenoTagger       | 0.720        | 8.94%      | 0.783        | 0.623        | 6.45%      | 0.583        |
| MMRerank          | 0.754        | 5.74%      | 0.811        | 0.822        | 5.74%      | 0.830        |
| MNIRerank         | 0.789        | 5.89%      | 0.845        | 0.802        | 5.89%      | 0.811        |
| PTRerank          | <b>0.843</b> | 5.56%      | <b>0.849</b> | <b>0.836</b> | 6.02%      | <b>0.854</b> |
